# Supplementary material
Source: PubMed Central journal article supplement (PMC2442527)
Supplement: pp.108.118224_1.pdf [file pp.108.118224_1.pdf]

**A**

ATGGCGGAGGAGAATCAAGAAGAAACCCTAGAACTCAAACCAAGTAGAAAACCACCACACTTTGTGCTAATACATGGCA

↑ LB  
*mes17-1* (Salk\_092550)

TGAGCTTAGGATCATGGTGTGGTACAAGATCAAATGTCTCATGGAAGTCTCTGGCTTCACCGTCACTTGCATCGACCT

CAAATCCTCCGGCATCGATTCTTCATCCGTGGATTCACACTACTACCTTCGACCAATACAACCAACCACTCATCGACTTCC

TCTCCTCTTTCCCGAACAAGAACAGgtgaaacctaattcagaactcaaatgaattgattcttgaatctgaagcaaactcactctgttttctctgtctgtttttcatc

agGTGATACTTGTGGGTCACAGTGCAGGAGGGCTTAGCCTAACGAGTGCATACAGAGATTCCCTAAGAAGATCTGTCT

CGCTGTTTTTATTGGAGCTTCGATGCTCAAAAACGGGCTTCAGACAGATGAAGATATGAAAGATgtaatgatacacatttcttaaagt

caagttaactgtgtgacgttatgtttctgtcacagGGAGTGCCTGATCTATCAGAACATGGTGATGTCTACGAGCTTGGTTTTGGTCTA

GGACCGGAGAATCCTCCCACCAGTGCTATTATCAAACCTGAATACCGACGAAAACACTTTACCACATGAGTCCTCAAC

← LB  
*mes17-2* (SAIL-503-C03)

AGgtttcttactgtttcatttcatatataatctcaaaagattaatgtgttaagtgtaggaaaattcgaccaactccttataaaaataaatcaccatttaatacaaaaattgcaatgttc

ataactaacctttatTTTTATTTATATATGTGTGTTTTCTATAACTTAACTAAACAATTATACAGGTATATATATCCAAAAATCTCCATTATAAAGTAAATATTCGTGAATTGTCTGC

tatgtacgtagaattatggtagtggatgtacatcatcgaattggagtgaaacatgcatatcaaatcaaatattacaaactatttcatcaaatccaaatccttgttctatactTTTTTT

gttgtgtgtgtgtgtgtgtaaagGAATGTTCTTGGCTGCATTAAATGATGAGACCAGCACCAATTTTGGCGTTAACGACAGCAAAAC

TGAAGAAGAGGAAAAAGAAAAAGACAAGAGGAGCAAGTGCCGCGCGTGTACATCAAGACGTTACTCGACCGGGTCA

TGAAACCGGAGCAGCAAGACGCGATGATAAGACGGTGGCCACCTAGCCAAGTTTACGAATTGGAGAGCGACCATTCTC

CTTTCTTCTCTAACCCTTTTGTTCTCTTTGGTTTACTCATCAAAGCTGCCGTTTCCGTCGGTTCTATCTAA

**B**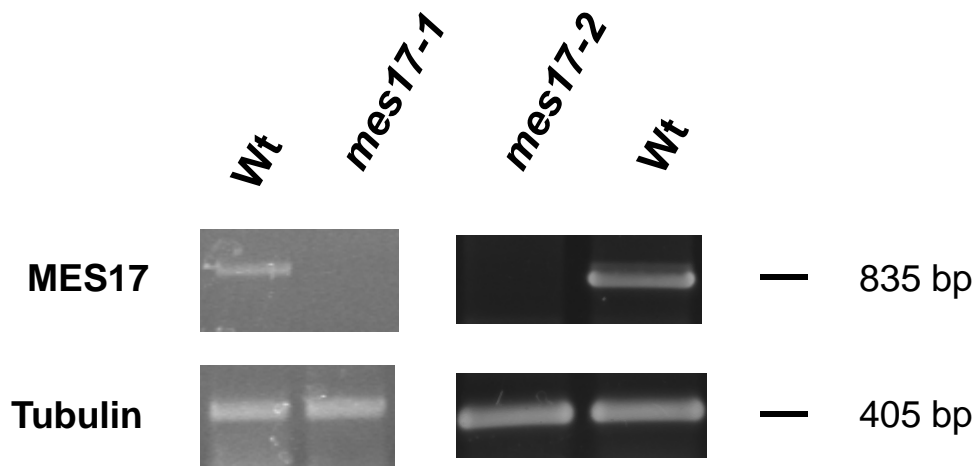

**Supplemental Figure 1:** *mes17-1* and *mes17-2* are null mutants of *AtMES17*. A. Location of the T-DNA insertions in *mes17-1* and *mes17-2*. B. RT-PCR of *mes17-1* and *mes17-2* using RNA from leaves of 4-week old plants, demonstrating lack of *MES17* transcript. Tubulin was used as a control.
